# Supplementary material for: Diagnosis Accuracy and Prognostic Significance of the Dickkopf-1 Protein in Gastrointestinal Carcinomas: Systematic Review and Network Meta-analysis
Source: PubMed Central journal article supplement (PMC7646173; doi:10.7150/jca.49970), 2020-10-18
Supplement: jcav11p7091s1.pdf [file jcav11p7091s1.pdf]

## **Table S1 Search strategies**

### **Search strategies for PubMed**

- #1. Dickkopf-1[All Fields] AND gastrointestinal[All Fields] AND ("carcinoma"[MeSH Terms] OR "carcinoma"[All Fields])
- #2. DKK-1[All Fields] AND gastrointestinal[All Fields] AND ("carcinoma"[MeSH Terms] OR "carcinoma"[All Fields]) AND ("neoplasms"[MeSH Terms] OR "neoplasms"[All Fields] OR "cancer"[All Fields])
- #3. #1 and #2
- #4. DKK-1[All Fields] AND ("gastrointestinal neoplasms"[MeSH Terms] OR ("gastrointestinal"[All Fields] AND "neoplasms"[All Fields]) OR "gastrointestinal neoplasms"[All Fields] OR ("digestive"[All Fields] AND "cancer"[All Fields]) OR "digestive cancer"[All Fields])
- #5. DKK-1[All Fields] AND alimentary[All Fields] AND ("neoplasms"[MeSH Terms] OR "neoplasms"[All Fields] OR "cancer"[All Fields])
- #6. #4and #5
- #7. #3 OR#6

### **Search strategies for EMBase**

- #1 'Dickkopf-1\$:ab,ti
- #2 'DKK-1\$:ab,ti
- #3 'gastrointestinal':it
- #4 'digestive':it
- #5 'carcinoma':it
- #6 ' cancer':it
- #8 #1or#2
- #9#3or#4
- #10 #5or#6
- #11 #5 and #6 and #7

### **Search strategies for Cochrane library**

- #1. Dickkopf-1 or DKK-1, gastrointestinal cancer or digestive cancer
- #2. MeSH descriptor

**Table S2 Main characteristics of DKK-1 in GIC**

**Table S2A Main characteristics of diagnosis value of DKK-1 in GIC**

| Study                  | Country | Cancer type | Control type                             | Case count(age, male/female) | Control count                                     | Test method | DKK-1 Cut-off values | Treatment | All Mark used | Data extra-ction type | TP | FP | FN | TN  |
|------------------------|---------|-------------|------------------------------------------|------------------------------|---------------------------------------------------|-------------|----------------------|-----------|---------------|-----------------------|----|----|----|-----|
| Zheng X, 2019[A1]      | China   | HCC         | Benign diseases+Healthy control          | liver ( 56.62 ±6.83)         | 70 82                                             | ELISA       | ≥2.0 ng/ml           | Untreated | AFP+TK1+DKK1  | Reported in text      | 47 | 7  | 23 | 75  |
| Zekri AR, 2020[A3]     | Egypt   | HCC         | Cirrhotic +Cirrhotic +Healthy control    | 78(58.27 ±9.7)               | 160                                               | ELISA       | 2000 pg/ml           | Untreated | AFP+DKK1      | Estimated             | 73 | 21 | 5  | 139 |
| Chen Z, 2019[1]        | China   | HCC         | B1:Benign diseases<br>B2:Healthy control | liver 120(49.6 ±2.3,68/52)   | B1:90(49.2 ±2.0, 50/40)<br>B2:80(48.6 ±1.9,45/35) | ELISA       | ≥2.0 ng/ml           | Untreated | AFP+TK1+DKK1  | Reported in text      | 66 | 54 | 15 | 75  |
| NAM Hassan(a), 2019[2] | Egypt   | HCC         | B1:liver cirrhosis<br>B2:Healthy control | 40                           | B1:24<br>B2:16                                    | ELISA       | more than 331 pg/ml  | Untreated | AFP+DKK1      | Estimated             | 28 | 5  | 12 | 35  |
| NAM Hassan(b), 2019[2] | Egypt   | HCC         | liver cirrhosis                          | 40                           | 24                                                | ELISA       | more than 331 pg/ml  | Untreated | AFP+DKK1      | Estimated             | 28 | 3  | 12 | 21  |
| NAM Hassan(c), 2019[2] | Egypt   | Early HCC   | B1:liver cirrhosis<br>B2:Healthy control | 20                           | B1:24<br>B2:16                                    | ELISA       | more than 331 pg/ml  | Untreated | AFP+DKK1      | Estimated             | 14 | 5  | 6  | 35  |

|                        |       |           |                                                    |                         |                                                                                      |       |                     |           |                           |                  |     |     |     |     |
|------------------------|-------|-----------|----------------------------------------------------|-------------------------|--------------------------------------------------------------------------------------|-------|---------------------|-----------|---------------------------|------------------|-----|-----|-----|-----|
| NAM Hassan(d), 2019[2] | Egypt | Early HCC | liver cirrhosis                                    | 20                      | 24                                                                                   | ELISA | more than 331 pg/ml | Untreated | AFP+D<br>KK1              | Estimated        | 14  | 3   | 6   | 21  |
| Xi L(a), 2019[3]       | China | HCC       | B1:liver cirrhosis<br>B2:HBV<br>B3:Healthy control | 122(54.9 ± 6.0, 105/17) | B1:152(54.9 ± 6.2, 119/33)<br>B2:105(55.5 ± 6.7, 81/24)<br>B3:101(54.9 ± 5.7, 80/21) | ELISA | 0.431               | Untreated | AFP+C<br>KAP4+<br>DKK1    | Estimated        | 80  | 8   | 42  | 350 |
| Xi L(b), 2019[3]       | China | HCC       | B1:liver cirrhosis<br>B2:HBV<br>B3:Healthy control | 76                      | B1:152(54.9 ± 6.2, 119/33)<br>B2:105(55.5 ± 6.7, 81/24)<br>B3:101(54.9 ± 5.7, 80/21) | ELISA | 0.431               | Untreated | AFP+C<br>KAP4+<br>DKK1    | Estimated        | 55  | 8   | 21  | 350 |
| Chen S, 2017[6]        | China | PC        | B1:Benign pancreatic disease<br>B2:Healthy control | 122                     | B1:58<br>B2:62                                                                       | ELISA | 2.0 ng/mL           | Untreated | CA19-9<br>+CA242<br>+DKK1 | Estimated        | 96  | 16  | 9   | 111 |
| Liu DJ, 2017 [7]       | China | PC        | Healthy control                                    | 311                     | 311                                                                                  | IHC   | -                   | Unknown   | DKK1                      | Reported in text | 205 | 106 | 188 | 123 |
| Qin QF, 2017 [8]       | China | HCC       | Benign liver diseases                              | 86                      | 100                                                                                  | ELISA | 2.0 ng/mL           | Untreated | AFP+D<br>CP+DK<br>K1      | Reported in text | 63  | 23  | 56  | 44  |
| Xie H, 2017[9]         | China | GC        | B1:Benign gastrosia diseases<br>B2:Healthy control | 75(60.3 ± 9.5, 49/26)   | B1:70(61.6 ± 6.9, 48/22)<br>B2:50(56.8 ± 7.7, 39/11)                                 | ELISA | 26.5 pg/mL          | Untreated | CA72-4<br>+TFF3+<br>DKK1  | Estimated        | 70  | 15  | 5   | 105 |

|                     |        |                                             |                                                        |                        |                                                      |       |              |           |                       |                  |    |    |    |    |
|---------------------|--------|---------------------------------------------|--------------------------------------------------------|------------------------|------------------------------------------------------|-------|--------------|-----------|-----------------------|------------------|----|----|----|----|
| Xu Y,2017[10]       | China  | Adenocarcinoma of esophago-gastric junction | Healthy control                                        | 79(38-78,65/14)        | 101(32-75,78/23)                                     | ELISA | 2615.9 pg/mL | Untreated | DKK1                  | Estimated        | 27 | 49 | 52 | 52 |
| Yao F H,2017[11]    | China  | HCC                                         | B1:HBV group<br>B2:Healthy control                     | 117(55.9 ± 8.2, 81/36) | B1:80(52.0 ± 7.9, 50/30)<br>B2:80(53.8 ± 9.5, 49/31) | ELISA | 2.153 µg/L   | Untreated | DKK1+AFP+G P73        | Reported in text | 89 | 17 | 28 | 63 |
| Erdal H(a),2016[12] | Turkey | HCC                                         | liver cirrhosis                                        | 40(64.2 ± 8.9, 36/4)   | 54(58.4 ± 10.0, 33/21)                               | ELISA | 1.4µg/L      | Untreated | AFP+D<br>KK1+D<br>KK3 | Estimated        | 29 | 18 | 11 | 36 |
| Erdal H(b),2016[12] | Turkey | HCC                                         | Healthy control                                        | 40(64.2 ± 8.9, 36/4)   | 39(58.4 ± 7.3, 10/29)                                | ELISA | 1.4µg/L      | Untreated | AFP+D<br>KK1+D<br>KK3 | Estimated        | 29 | 15 | 11 | 24 |
| Erdal H(c),2016[12] | Turkey | Early HCC                                   | liver cirrhosis                                        | 29                     | 54(58.4 ± 10.0, 33/21)                               | ELISA | 1.4µg/L      | Untreated | AFP+D<br>KK1+D<br>KK3 | Estimated        | 22 | 18 | 7  | 36 |
| Erdal H(d),2016[12] | Turkey | Early HCC                                   | Healthy control                                        | 29                     | 39(58.4 ± 7.3, 10/29)                                | ELISA | 1.4µg/L      | Untreated | AFP+D<br>KK1+D<br>KK3 | Estimated        | 22 | 15 | 7  | 24 |
| Fouad YM,2016[13]   | Egypt  | HCC                                         | B1:Chronic HCV group<br>B2:liver cirrhosis group       | 50(59.3 ± 8.7, 34/16)  | B1:20(42.7 ± 9.8, 13/7)<br>B2:20(54.3 ± 5.1, 14/6)   | ELISA | 1.53 ng/mL   | Untreated | DKK1+AFP              | Estimated        | 34 | 4  | 16 | 36 |
| Mao L,2016[14]      | China  | HCC                                         | B1:liver cirrhosis Group<br>B2:HBV group<br>B3:Healthy | 48(56.1, 37/11)        | B1:20(52.3, 16/4)<br>B2:20(37.8, 13/7)               | ELISA | 565ng/L      | Untreated | DKK1                  | Estimated        | 45 | 18 | 3  | 42 |

|                  |       |           |                                                                |                          |                                                                                    |       |                                          |           |                                 |                  |    |    |    |     |  |
|------------------|-------|-----------|----------------------------------------------------------------|--------------------------|------------------------------------------------------------------------------------|-------|------------------------------------------|-----------|---------------------------------|------------------|----|----|----|-----|--|
|                  |       |           | control                                                        |                          | B3:20(47.3,14/6)                                                                   |       |                                          |           |                                 |                  |    |    |    |     |  |
| Su R,2016[15]    | China | HCC       | B1:HBV group<br>B2:liver cirrhosis Group<br>B3:Healthy control | 120(55.6 ± 14.2,84/36)   | B1:60(47.7 ± 15.3, 32/28)<br>B2:60(53.5 ± 13.9, 36/24)<br>B3:60(50.5 ± 4.8, 35/25) | ELISA | 10.13ng/mL                               | Untreated | DKK1+<br>AFP                    | Reported in text | 58 | 9  | 62 | 171 |  |
| Zhao P,2016[16]  | China | HCC       | B1:HBV group<br>B2:liver cirrhosis Group<br>B3:Healthy control | 60(55.6 ± 5.5, 54/6)     | B1:40(44.2 ± 7.3, 31/9)<br>B2:40(58.6 ± 7.3, 27/13)<br>B3:40(48.6 ± 5.7, 28/12)    | ELISA | 2.153μg/L                                | Untreated | DKK1+<br>AFP                    | Estimated        | 48 | 12 | 12 | 108 |  |
| Fu Y,2015[17]    | China | HCC       | adjacent tissue                                                | 75(52.47 ± 10.62, 64/11) | 75                                                                                 | IHC   | More than 50% of the cells were positive | Surgery   | C-MET+GolpII<br>2+EZH2<br>+DKK1 | Reported in text | 63 | 24 | 12 | 51  |  |
| Ge T(a),2015[18] | USA   | HCC       | B1:liver cirrhosis Group<br>B2:HBV group<br>B3:Healthy control | 89                       | B1:36<br>B2:65<br>B3:200                                                           | ELISA | 1.31 ng/mL                               | Untreated | AFP+D<br>KK1+O<br>PN            | Estimated        | 71 | 32 | 18 | 269 |  |
| Ge T(b),2015[18] | USA   | HCC       | B1:liver cirrhosis Group<br>B2:HBV group                       | 89                       | B1:36<br>B2:65                                                                     | ELISA | 1.31 ng/mL                               | Untreated | AFP+D<br>KK1+O<br>PN            | Estimated        | 71 | 7  | 18 | 94  |  |
| Ge T(c),2015[18] | USA   | Early HCC | B1:liver cirrhosis Group<br>B2:HBV group                       | 56                       | B1:36<br>B2:65<br>B3:200                                                           | ELISA | 1.31 ng/mL                               | Untreated | AFP+D<br>KK1+O<br>PN            | Estimated        | 44 | 32 | 12 | 269 |  |

|                    |       |           |                            |                         |                           |        |                            |             |                      |           |     |    |    |    |
|--------------------|-------|-----------|----------------------------|-------------------------|---------------------------|--------|----------------------------|-------------|----------------------|-----------|-----|----|----|----|
|                    |       |           | B3:Healthy control         |                         |                           |        |                            |             |                      |           |     |    |    |    |
| Ge T(d),2015[18]   | USA   | Early HCC | B1:liver cirrhosis Group   | 56                      | B1:36                     | ELIS A | 1.31 ng/mL                 | Untreated   | AFP+D<br>KK1+O<br>PN | Estimated | 44  | 7  | 12 | 94 |
| Han SX(a),2015[19] | China | PC        | B1:Benign pancreatic tumor | 140(61.7 ± 10.8, 88/52) | B1:18(58.8 ± 12.1, 12/6)  | ELIS A | 39.3U/ml and 1560.02p g/ml | Untreated   | DKK1+<br>CA19-9      | Estimated | 125 | 19 | 15 | 73 |
|                    |       |           | B2:Chronic pancreatitis    |                         | B2:26(57.6 ± 11.3, 22/4)  |        |                            |             |                      |           |     |    |    |    |
|                    |       |           | B3:Healthy control         |                         | B3:48(59.1 ± 11.0, 30/18) |        |                            |             |                      |           |     |    |    |    |
| Han SX(b),2015[19] | China | PC        | B1:Benign pancreatic tumor | 140(61.7 ± 10.8, 88/52) | B1:18(58.8 ± 12.1, 12/6)  | ELIS A | 39.3U/ml and 1560.02p g/ml | Untreated   | DKK1+<br>CA19-9      | Estimated | 125 | 12 | 15 | 32 |
|                    |       |           | B2:Chronic pancreatitis    |                         | B2:26(57.6 ± 11.3, 22/4)  |        |                            |             |                      |           |     |    |    |    |
| Han SX(c),2015[19] | China | Early PC  | B1:Benign pancreatic tumor | 62                      | B1:18(58.8 ± 12.1, 12/6)  | ELIS A | 39.3U/ml and 1560.02p g/ml | Untreated   | DKK1+<br>CA19-9      | Estimated | 53  | 19 | 9  | 73 |
|                    |       |           | B2:Chronic pancreatitis    |                         | B2:26(57.6 ± 11.3, 22/4)  |        |                            |             |                      |           |     |    |    |    |
|                    |       |           | B3:Healthy control         |                         | B3:48(59.1 ± 11.0, 30/18) |        |                            |             |                      |           |     |    |    |    |
| Han SX(d),2015[19] | China | Early PC  | B1:Benign pancreatic tumor | 62                      | B1:18(58.8 ± 12.1, 12/6)  | ELIS A | 39.3U/ml and 1560.02p g/ml | Untreated   | DKK1+<br>CA19-9      | Estimated | 53  | 12 | 9  | 32 |
|                    |       |           | B2:Chronic pancreatitis    |                         | B2:26(57.6 ± 11.3, 22/4)  |        |                            |             |                      |           |     |    |    |    |
| Peng Y,2015[22]    | China | EPC       | Healthy control            | 126(40-80, 102/24)      | 60(37-76,47/13)           | ELIS A |                            | Non-surgery | DKK1+<br>P53         | Estimated | 78  | 3  | 48 | 57 |
| Wang               | China | PC        | Benign                     | 44                      | 19                        | IHC    | More                       | Untreated   | DKK1+                | Reported  | 30  | 1  | 14 | 18 |

|                    |       |                 |                                                                |                          |                          |       |                                     |           |              |             |     |    |     |     |
|--------------------|-------|-----------------|----------------------------------------------------------------|--------------------------|--------------------------|-------|-------------------------------------|-----------|--------------|-------------|-----|----|-----|-----|
| Q,2014[25]         |       |                 | pancreatic tumor                                               |                          |                          |       | than 50% of the cells were positive | ated      | CA19-9       | ted in text |     |    |     |     |
| Zhou Y,2014[26]    | China | PC              | Healthy control                                                | 50(65.04 ± 13.55, 31/19) | 50(53.42 ± 10.66, 27/23) | ELISA | 22.5μg / L                          | Untreated | DKK1+ CA19-9 | Estimated   | 26  | 4  | 24  | 46  |
| Peng L,2013[27]    | China | HCC             | B1:HBV group<br>B2:liver cirrhosis Group                       | 35                       | B1:38<br>B2:105          | ELISA | 2.13 ng/mL                          | Untreated | AFP+D<br>KK1 | Estimated   | 28  | 29 | 7   | 117 |
| Yang H(a),2013[28] | China | Early stage HCC | liver cirrhosis Group                                          | 104(54.5,91/13)          | 102(45,77/25)            | IHC   | 6.25 ng/mL                          | Untreated | AFP+D<br>KK1 | Estimated   | 61  | 21 | 43  | 81  |
| Yang H(b),2013[28] | China | Early stage HCC | liver cirrhosis Group                                          | 80(51.5, 71/9)           | 72(43,58/14)             | IHC   | 6.25 ng/mL                          | Surgery   | AFP+D<br>KK1 | Estimated   | 44  | 13 | 36  | 59  |
| Shen Q(a),2012[31] | China | HCC             | B1:HBV group<br>B2:liver cirrhosis Group<br>B3:Healthy control | 424                      | B1:98<br>B2:96<br>B3:213 | ELISA | 0.03 ng/mL                          | Untreated | AFP+D<br>KK1 | Estimated   | 293 | 38 | 131 | 369 |
| Shen Q(b),2012[31] | China | HCC             | B1:HBV group<br>B2:liver cirrhosis Group                       | 424                      | B1:98<br>B2:96           | ELISA | 0.03 ng/mL                          | Untreated | AFP+D<br>KK1 | Estimated   | 293 | 30 | 131 | 164 |
| Shen Q(c),2012[31] | China | HCC             | B1:HBV group<br>B2:liver cirrhosis Group<br>B3:Healthy control | 209                      | B1:73<br>B2:72<br>B3:99  | ELISA | 0.03 ng/mL                          | Untreated | AFP+D<br>KK1 | Estimated   | 149 | 31 | 60  | 213 |

|                     |        |                                      |                                             |                     |                     |           |                                         |           |              |                  |     |     |     |     |
|---------------------|--------|--------------------------------------|---------------------------------------------|---------------------|---------------------|-----------|-----------------------------------------|-----------|--------------|------------------|-----|-----|-----|-----|
| Shen Q(d),2012[31]  | China  | HCC                                  | B1:HBV group<br>B2:liver cirrhosis<br>Group | 209                 | B1:73<br>B2:72      | ELIS<br>A | 0.03<br>ng/mL                           | Untreated | AFP+D<br>KK1 | Estimated        | 149 | 14  | 60  | 131 |
| Zhang Y,2012[33]    | China  | A1:EPC<br>A2:precancerous<br>lesions | Healthy control                             | A1:72<br>A2:13      | 30                  | ELIS<br>A | 13.4µg/<br>L                            | Untreated | DKK1         | Reported in text | 63  | 1   | 22  | 29  |
| Soydinc HO,2011[34] | Turkey | CRC                                  | Healthy control                             | 295(59)             | 90(50)              | ELIS<br>A | 29.36<br>ng/mL                          | Untreated | DKK1         | Estimated        | 175 | 45  | 120 | 45  |
| Zhou Y, 2011[36]    | China  | PC                                   | Benign pancreatic disease                   | 24                  | 7                   | IHC       | More than 5% of the cells were positive | Untreated | DKK1         | Reported in text | 21  | 0   | 3   | 7   |
| Zhang X,2010[37]    | China  | GC                                   | Healthy control                             | 34(28-87,<br>23/11) | 38(22-75,<br>25/13) | ELIS<br>A | 3.539µg/<br>L                           | Untreated | DKK1         | Estimated        | 21  | 6   | 13  | 32  |
| Li B,2009[38]       | China  | EPC                                  | Healthy control                             | 80(45-79,<br>68/12) | 35                  | ELIS<br>A | 14.54ng/<br>mL                          | Untreated | DKK1         | Reported in text | 53  | 6   | 27  | 29  |
| Yamabuki T,2007[40] | Japan  | EPC                                  | Healthy control                             | 81                  | 207                 | IHC       | 3.3µg/ L                                | Untreated | DKK1         | Reported in text | 51  | 197 | 30  | 10  |

A:Cancer case group; B: Control case group; ELISA:enzyme-linked immunosorbent assay;IHC: Immunohistochemistry;

HCC:hepatocellular carcinoma; PC:pancreatic carcinoma ; GC:gastric carcinoma ; EPC:esophageal carcinoma; CRC: Colorectal carcinoma

FN = false negative; FP = false positive; TN = true negative; TP = true positive.

**29researches, 46analysis**



**Table S2B Main characteristics of prognostic value of DKK-1 in GIC**

| Study            | Count | High/Low (age, male/female)   | Cancer type | Control type                                    | Patient treatment | Research type      | Test method | Cut-off values                           | All Mark used                               | Tumor size(<5/>5cm) | TNM stage(I+II/II I+IV) | Differentiation grade (Well and moderate/Poor) | Lymphatic invasion (Yes/No) | Lymph node metastasis (Yes/No) | Vascular invasion (Yes/No) | Distant metastasis (Yes/No) | Data extraction type |
|------------------|-------|-------------------------------|-------------|-------------------------------------------------|-------------------|--------------------|-------------|------------------------------------------|---------------------------------------------|---------------------|-------------------------|------------------------------------------------|-----------------------------|--------------------------------|----------------------------|-----------------------------|----------------------|
| Hu W,2020[A2]    | China | H:21<br>L:26                  | GC          | adjacent tissue+Healthy control                 | Surgey            | Case-control study | IHC         | Unknown                                  | DKK-1                                       | H:14/7<br>L:18/8    | H:3/18<br>L:17/9        |                                                |                             | H:18/3<br>L:15/12              |                            |                             |                      |
| Gu L,2018[4]     | China | H:28(14/14)<br>L:132(80/52)   | GC          | B1: adjacent tissue<br>B2:Normal gastric mucosa |                   | Case-control study | IHC         | More than 25% of the cells were positive | OPN, sLAG-3, DKK-1                          |                     | H:18/10<br>L:10/82      | H:10/18<br>L:80/52                             | -                           | H:16/12<br>L:84/48             | -                          | -                           | Reported in text     |
| Hong SA, 2018[5] | Korea | H:73(53/20)<br>L:85(60/25)    | GC          | -                                               | Surgey            | Case-control study | IHC         | More than 60 H scores,                   | DKK1 expressi on with β-catenin positivitiy |                     | H:27/46<br>L:41/44      | H:26/47<br>L:20/65                             | H:62/11<br>L:65/20          | -                              | H:7/66<br>L:5/80           |                             | Reported in text     |
| Liu DJ, 2017[7]  | China | H:205(122/83)<br>L:106(54/52) | PC          | Healthy control                                 | Unknown           | Case-control study | IHC         | Unknown                                  | DKK-1                                       |                     | H:20/185<br>L:19/87     | H:128/77<br>L:66/40                            |                             | H:120/85<br>L:75/31            | H:182/23<br>L:98/8         | H:181/24<br>L:100/6         | Reported in text     |
| Xu               | China | H:27(22)                      | Adenoc      | -                                               | Surgey            | Case-control study | ELIS        | 2615.9                                   | DKK-1                                       | H:10/1              | H:5/22                  | -                                              | -                           | H:22/5                         | -                          | H:8/19                      | Estima               |

|                        |       |                                                                    |                                                         |   |                                  |                           |           |                                                         |                                     |                             |                             |                             |                             |                              |                             |                         |
|------------------------|-------|--------------------------------------------------------------------|---------------------------------------------------------|---|----------------------------------|---------------------------|-----------|---------------------------------------------------------|-------------------------------------|-----------------------------|-----------------------------|-----------------------------|-----------------------------|------------------------------|-----------------------------|-------------------------|
| Y,2017<br>[10]         |       | /5)<br>L:52(43/<br>9)                                              | arcinom<br>a of<br>esophag<br>o-gastri<br>c<br>junction |   | y                                | ontrol<br>study           | A         | pg/mL                                                   |                                     | 5<br>L:25/2<br>1            | L:9/43                      |                             | L:32/1<br>0                 | L:5/47                       | ted                         |                         |
| Fu<br>Y,2015<br>[17]   | China | H:63(51.<br>2 ± 11.6,<br>56/7)<br>L:12(52.<br>7 ±<br>10.5,8/4<br>) | HCC                                                     | - | Surger<br>y                      | Case-c<br>ontrol<br>study | IHC       | More<br>than 50%<br>of the<br>cells<br>were<br>positive | C-MET+<br>Golpl12+<br>EZH2+D<br>KK1 | H:42/2<br>1<br>L:6/6        |                             |                             | H :<br>7/56<br>L :<br>2/10  | H:26/3<br>7<br>L:5/7         | Report<br>ed in<br>text     |                         |
| Ma<br>G,201<br>5[20]   | China | H:133(1<br>02/31)<br>L:195(1<br>33/62)                             | GC                                                      | - | Surger<br>y+che<br>mother<br>apy | Case-c<br>ontrol<br>study | IHC       | More<br>than 50%<br>of the<br>cells<br>were<br>positive | DKK1                                | H:76/5<br>7<br>L:116/<br>79 | H:75/3<br>6<br>L:71/1<br>46 | H:35/9<br>2<br>L:61/1<br>37 | H:52/8<br>1<br>L:150/<br>45 | H:27/1<br>06<br>L:100/<br>95 | H:6/12<br>7<br>L:40/1<br>55 | Report<br>ed in<br>text |
| Ma<br>X,201<br>5[21]   | China | H:18(13<br>/5)<br>L:54(43/<br>11)                                  | HCC                                                     | - | Surger<br>y                      | Case-c<br>ontrol<br>study | ELIS<br>A | 1769<br>pg/mL                                           | DKK1                                | H:12/6<br>L:33/2<br>1       | H:15/3<br>L:42/1<br>2       |                             |                             | H:10/8<br>L:22/3<br>2        | Report<br>ed in<br>text     |                         |
| Peng<br>Y,2015<br>[22] | China | H:57(42<br>/15)<br>L:69(60/<br>9)                                  | EPC                                                     | - | Non-s<br>urgery                  | Case-c<br>ontrol<br>study | ELIS<br>A | More<br>than 50%<br>of the<br>cells<br>were<br>positive | DKK1+<br>P53                        |                             | H:35/2<br>2<br>L:28/4<br>1  |                             | H:33/2<br>4<br>L:51/1<br>6  |                              | Report<br>ed in<br>text     |                         |
| Tan<br>J,2015          | China | H:35(28<br>/7)                                                     | EPC                                                     | - | Surger<br>y                      | Case-c<br>ontrol          | IHC       | More<br>than 50%                                        | DKK1                                |                             | H:19/1<br>6                 | H:24/1<br>1                 | H:17/1<br>8                 |                              | Report<br>ed in             |                         |

|                  |       |                                                          |    |                 |           |                    |     |                                          |                   |                     |                     |                     |                     |                      |                     |                  |
|------------------|-------|----------------------------------------------------------|----|-----------------|-----------|--------------------|-----|------------------------------------------|-------------------|---------------------|---------------------|---------------------|---------------------|----------------------|---------------------|------------------|
| [23]             |       | L:15(10/5)                                               |    |                 |           | study              |     | of the cells were positive               |                   | L:14/1              | L:14/1              | L:10/5              |                     | text                 |                     |                  |
| Cai L,2014 [24]  | China | H:27(60 ± 14.93, 19/8)<br>L:126(58.11 ± 12.07, 83/43)    | GC | -               | Surgey    | Case-control study | IHC | 60 pg/mL                                 | DKK1+ CEA+C A19-9 | H:15/12<br>L:100/26 | H:11/16<br>L:88/38  | H:22/59<br>L:117/12 | H:16/11<br>L:114/12 | H:22/59<br>L:117/9   | Reported in text    |                  |
| Wang Q,2014 [25] | China | H:30<br>L:14                                             | PC | -               | Untreated | Case-control study | IHC | More than 50% of the cells were positive | DKK1+ CEA+C A19-9 | H:8/22<br>L:10/4    | H:15/15<br>L:2/12   | H:24/6<br>L:7/7     |                     | Reported in text     |                     |                  |
| Gao C,2012 [29]  | China | H:195(57.2 ± 9.6, 133/62)<br>L:133(61.9 ± 11.8, 102//31) | GC | -               | Surgey    | Case-control study | IHC | More than 50% of the cells were positive | DKK1              | H:116/79<br>L:76/57 | H:49/146<br>L:97/36 | H:61/132<br>L:35/88 | H:150/45<br>L:52/81 | H:100/95<br>L:27/106 | H:40/155<br>L:6/127 | Reported in text |
| Lee HS,2012 [30] | Korea | H:27(60 ± 14.93, 19/8)<br>L:126(58.11 ±                  | GC | Healthy control | Surgey    | Case-control study | IHC | 60 pg/mL                                 | DKK1+ CEA+C A19-9 | H:15/12<br>L:100/26 | H:11/16<br>L:88/38  | H:13/14<br>L:81/45  | H:16/11<br>L:114/12 | H:22/59<br>L:117/9   | Reported in text    |                  |

|                     |       |                                               |                                 |                 |              |                    |       |                                          |                                |                   |                   |                   |                   |                  |                  |
|---------------------|-------|-----------------------------------------------|---------------------------------|-----------------|--------------|--------------------|-------|------------------------------------------|--------------------------------|-------------------|-------------------|-------------------|-------------------|------------------|------------------|
| Zhang X,2012[32]    | China | 12.07,<br>83/43)<br>H:19(10/9)<br>L:31(18/13) | Intrahepatic cholangiocarcinoma | Healthy control | Untreated    | Case-control study | IHC   | More than 25% of the cells were positive | DKK1                           | H:7/12<br>L:14/17 | H:11/8<br>L:27/4  | H:14/5<br>L:20/11 | H:5/14<br>L:2/29  | H:4/14<br>L:1/29 | Reported in text |
| Tung EK, 2011[35]   | China | H:23(19/4)<br>L:77(63/14)                     | HCC                             | -               | Untreated    | Case-control study | ELISA | 1500 pg/mL                               | DKK1                           | H:5/17<br>L:39/37 | H:4/18<br>L:30/44 |                   | H:6/6<br>L:15/22  |                  | Reported in text |
| Li B,2009[38]       | China | H:53<br>L:27                                  | EPC                             | Healthy control | Untreated    | Case-control study | ELISA | 14.54ng/mL                               | DKK1+<br>CEA+C<br>YFRA21<br>-1 |                   | H:17/3<br>L:16/11 | H:40/1<br>L:18/9  | H:43/1<br>L:15/12 |                  | Reported in text |
| Makinoto T,2009[39] | Japan | H:72(63/9)<br>L:98(89/9)                      | EPC                             | -               | Chemotherapy | Case-control study | IHC   | More than 10% of the cells were positive | DKK1                           |                   | H:28/4<br>L:45/53 | H:13/5<br>L:28/70 |                   |                  | Reported in text |

H:High expression group; L: Low expression group; ELISA:enzyme-linked immunosorbent assay;IHC: Immunohistochemistry;  
HCC:hepatocellular carcinoma; PC:pancreatic carcinoma ; GC:gastric carcinoma ; EPC:esophageal carcinoma; CRC: Colorectal carcinoma

**Table S3 Quality assessment of included of studies by QUADAS-2 scales.**

| Study               | PATIENT SELECTION                                        |                                    |                                               |                                                                               | INDEX TEST(S)                                                                        |                                                |                                                                                                       | REFERENCE STANDARD                                                           |                                                                             |                                                                                                                     | FLOW AND TIMING                                                                 |                                                       |                                                   |                                             |                                              |
|---------------------|----------------------------------------------------------|------------------------------------|-----------------------------------------------|-------------------------------------------------------------------------------|--------------------------------------------------------------------------------------|------------------------------------------------|-------------------------------------------------------------------------------------------------------|------------------------------------------------------------------------------|-----------------------------------------------------------------------------|---------------------------------------------------------------------------------------------------------------------|---------------------------------------------------------------------------------|-------------------------------------------------------|---------------------------------------------------|---------------------------------------------|----------------------------------------------|
|                     | Was a consecutive or random sample of patients enrolled? | Was a case-control design avoided? | Did the study avoid inappropriate exclusions? | Is there concern that the included patients do not match the review question? | Were the index test results interpreted without knowledge of the reference standard? | If a threshold was used, was it pre-specified? | Is there concern that the index test, its conduct, or interpretation differ from the review question? | Is the reference standard likely to correctly classify the target condition? | Were the reference results interpreted without knowledge of the index test? | Is there concern that the target condition as defined by the reference standard does not match the review question? | Was there an appropriate interval between index test(s) and reference standard? | Did all patients receive the same reference standard? | Did patients receive the same reference standard? | Were all patients included in the analysis? | Could the patient flow have introduced bias? |
| Chen Z, 2019[1]     | Yes                                                      | Yes                                | Unclear                                       | Unclear                                                                       | Yes                                                                                  | Unclear                                        | Unclear                                                                                               | Yes                                                                          | Unclear                                                                     | Unclear                                                                                                             | Unclear                                                                         | Yes                                                   | Yes                                               | Yes                                         | Unclear                                      |
| NAM Hassan, 2019[2] | Yes                                                      | Yes                                | Unclear                                       | Unclear                                                                       | Yes                                                                                  | Unclear                                        | Unclear                                                                                               | Yes                                                                          | Unclear                                                                     | Unclear                                                                                                             | Unclear                                                                         | Yes                                                   | Yes                                               | Yes                                         | Unclear                                      |
| Xi L, 2019[3]       | Yes                                                      | Yes                                | Unclear                                       | Unclear                                                                       | Yes                                                                                  | Unclear                                        | Unclear                                                                                               | Yes                                                                          | Unclear                                                                     | Unclear                                                                                                             | Unclear                                                                         | Yes                                                   | Yes                                               | Yes                                         | Unclear                                      |
| Chen S, 2017[6]     | Yes                                                      | Yes                                | Unclear                                       | Unclear                                                                       | Yes                                                                                  | Unclear                                        | Unclear                                                                                               | Yes                                                                          | Unclear                                                                     | Unclear                                                                                                             | Unclear                                                                         | Yes                                                   | Yes                                               | Yes                                         | Unclear                                      |
| Qin QF,2017[8]      | Yes                                                      | Yes                                | Unclear                                       | Unclear                                                                       | Yes                                                                                  | Unclear                                        | Unclear                                                                                               | Yes                                                                          | Unclear                                                                     | Unclear                                                                                                             | Unclear                                                                         | Yes                                                   | Yes                                               | Yes                                         | Unclear                                      |
| Xie H, 2017[9]      | Yes                                                      | Yes                                | Unclear                                       | Unclear                                                                       | Yes                                                                                  | Unclear                                        | Unclear                                                                                               | Yes                                                                          | Unclear                                                                     | Unclear                                                                                                             | Unclear                                                                         | Yes                                                   | Yes                                               | Yes                                         | Unclear                                      |
| Xu Y,2017[10]       | Yes                                                      | Yes                                | Unclear                                       | Unclear                                                                       | Yes                                                                                  | Unclear                                        | Unclear                                                                                               | Yes                                                                          | Unclear                                                                     | Unclear                                                                                                             | Unclear                                                                         | Yes                                                   | Yes                                               | Yes                                         | Unclear                                      |
| Yao F H,2017[11]    | Yes                                                      | Yes                                | Unclear                                       | Unclear                                                                       | Yes                                                                                  | Unclear                                        | Unclear                                                                                               | Yes                                                                          | Unclear                                                                     | Unclear                                                                                                             | Unclear                                                                         | Yes                                                   | Yes                                               | Yes                                         | Unclear                                      |
| Erdal H,2016[12]    | Yes                                                      | Yes                                | Unclear                                       | Unclear                                                                       | Yes                                                                                  | Unclear                                        | Unclear                                                                                               | Yes                                                                          | Unclear                                                                     | Unclear                                                                                                             | Unclear                                                                         | Yes                                                   | Yes                                               | Yes                                         | Unclear                                      |
| Fouad YM,2016[13]   | Yes                                                      | Yes                                | Unclear                                       | Unclear                                                                       | Yes                                                                                  | Unclear                                        | Unclear                                                                                               | Yes                                                                          | Unclear                                                                     | Unclear                                                                                                             | Unclear                                                                         | Yes                                                   | Yes                                               | Yes                                         | Unclear                                      |

|                        |     |     |         |         |     |         |         |     |         |         |         |     |     |     |         |
|------------------------|-----|-----|---------|---------|-----|---------|---------|-----|---------|---------|---------|-----|-----|-----|---------|
| Mao L,2016[14]         | Yes | Yes | Unclear | Unclear | Yes | Unclear | Unclear | Yes | Unclear | Unclear | Unclear | Yes | Yes | Yes | Unclear |
| Su R,2016[15]          | Yes | Yes | Unclear | Unclear | Yes | Unclear | Unclear | Yes | Unclear | Unclear | Unclear | Yes | Yes | Yes | Unclear |
| Zhao P,2016[16]        | Yes | Yes | Unclear | Unclear | Yes | Unclear | Unclear | Yes | Unclear | Unclear | Unclear | Yes | Yes | Yes | Unclear |
| Fu Y,2015[17]          | Yes | Yes | Unclear | Unclear | Yes | Unclear | Unclear | Yes | Unclear | Unclear | Unclear | Yes | Yes | Yes | Unclear |
| Ge T,2015[18]          | Yes | Yes | Unclear | Unclear | Yes | Unclear | Unclear | Yes | Unclear | Unclear | Unclear | Yes | Yes | Yes | Unclear |
| Han SX,2015[19]        | Yes | Yes | Unclear | Unclear | Yes | Unclear | Unclear | Yes | Unclear | Unclear | Unclear | Yes | Yes | Yes | Unclear |
| Peng Y,2015[22]        | Yes | Yes | Unclear | Unclear | Yes | Unclear | Unclear | Yes | Unclear | Unclear | Unclear | Yes | Yes | Yes | Unclear |
| Wang Q,2014[25]        | Yes | Yes | Unclear | Unclear | Yes | Unclear | Unclear | Yes | Unclear | Unclear | Unclear | Yes | Yes | Yes | Unclear |
| Zhou Y,2014[26]        | Yes | Yes | Unclear | Unclear | Yes | Unclear | Unclear | Yes | Unclear | Unclear | Unclear | Yes | Yes | Yes | Unclear |
| Peng L,2013[27]        | Yes | Yes | Unclear | Unclear | Yes | Unclear | Unclear | Yes | Unclear | Unclear | Unclear | Yes | Yes | Yes | Unclear |
| Yang H,2013[28]        | Yes | Yes | Unclear | Unclear | Yes | Unclear | Unclear | Yes | Unclear | Unclear | Unclear | Yes | Yes | Yes | Unclear |
| Shen Q,2012[31]        | Yes | Yes | Unclear | Unclear | Yes | Unclear | Unclear | Yes | Unclear | Unclear | Unclear | Yes | Yes | Yes | Unclear |
| Zhang Y,2012[33]       | Yes | Yes | Unclear | Unclear | Yes | Unclear | Unclear | Yes | Unclear | Unclear | Unclear | Yes | Yes | Yes | Unclear |
| Soydinc<br>HO,2011[34] | Yes | Yes | Unclear | Unclear | Yes | Unclear | Unclear | Yes | Unclear | Unclear | Unclear | Yes | Yes | Yes | Unclear |
| Zhou Y, 2011[36]       | Yes | Yes | Unclear | Unclear | Yes | Unclear | Unclear | Yes | Unclear | Unclear | Unclear | Yes | Yes | Yes | Unclear |
| Zhang X,2010[37]       | Yes | Yes | Unclear | Unclear | Yes | Unclear | Unclear | Yes | Unclear | Unclear | Unclear | Yes | Yes | Yes | Unclear |
| Li B,2009[38]          | Yes | Yes | Unclear | Unclear | Yes | Unclear | Unclear | Yes | Unclear | Unclear | Unclear | Yes | Yes | Yes | Unclear |
| Yamabuki<br>T,2007[40] | Yes | Yes | Unclear | Unclear | Yes | Unclear | Unclear | Yes | Unclear | Unclear | Unclear | Yes | Yes | Yes | Unclear |
| Zheng X, 2019[A1]      | Yes | Yes | Unclear | Unclear | Yes | Unclear | Unclear | Yes | Unclear | Unclear | Unclear | Yes | Yes | Yes | Unclear |
| Zekri AR, 2020[A3]     | Yes | Yes | Unclear | Unclear | Yes | Unclear | Unclear | Yes | Unclear | Unclear | Unclear | Yes | Yes | Yes | Unclear |

**Table S4 Quality assessment of included of studies by Critical Appraisal Skills Programme (CASP) scales.**

| Study, Year      | 1. Did the study address a clearly focused issue? | 2. Was the cohort recruited in an acceptable way? | 3. Was the exposure accurately measured to minimise bias? | 4. Was the outcome accurately measured to minimise bias? | 5. (a) Have the authors identified all important confounding factors? | 5. (b) Have they taken account of the confounding factors in the design and/or analysis? | 6. (a) Was the follow up of subjects complete enough? | 6. (b) Was the follow up of subjects long enough? | 7. What are the results of this study? | 8. How precise are the results? | 9. Do you believe the results? | 10. Can the results be applied to the local population? | 11. Do the results of this study fit with other available evidence? | 12. What are the implications of this study for practice? |
|------------------|---------------------------------------------------|---------------------------------------------------|-----------------------------------------------------------|----------------------------------------------------------|-----------------------------------------------------------------------|------------------------------------------------------------------------------------------|-------------------------------------------------------|---------------------------------------------------|----------------------------------------|---------------------------------|--------------------------------|---------------------------------------------------------|---------------------------------------------------------------------|-----------------------------------------------------------|
| Gu L,2018[4]     | Yes                                               | Yes                                               | Yes                                                       | Yes                                                      | Can't tell                                                            | Can't tell                                                                               | Can't tell                                            | Can't tell                                        | Yes                                    | Can't tell                      | Yes                            | Yes                                                     | Yes                                                                 | Yes                                                       |
| Hong SA, 2018[5] | Yes                                               | Yes                                               | Yes                                                       | Yes                                                      | Can't tell                                                            | Can't tell                                                                               | Yes                                                   | Yes                                               | Yes                                    | Can't tell                      | Yes                            | Yes                                                     | Yes                                                                 | Yes                                                       |
| Xu Y,2017[10]    | Yes                                               | Yes                                               | Yes                                                       | Yes                                                      | Can't tell                                                            | Can't tell                                                                               | Can't tell                                            | Can't tell                                        | Yes                                    | Can't tell                      | Yes                            | Yes                                                     | Yes                                                                 | Yes                                                       |
| Fu Y,2015[17]    | Yes                                               | Yes                                               | Yes                                                       | Yes                                                      | Can't tell                                                            | Can't tell                                                                               | Can't tell                                            | Can't tell                                        | Yes                                    | Can't tell                      | Yes                            | Yes                                                     | Yes                                                                 | Yes                                                       |
| Ma G,2015[20]    | Yes                                               | Yes                                               | Yes                                                       | Yes                                                      | Can't tell                                                            | Can't tell                                                                               | Yes                                                   | Can't tell                                        | Yes                                    | Can't tell                      | Yes                            | Yes                                                     | Yes                                                                 | Yes                                                       |
| Ma X,2015[21]    | Yes                                               | Yes                                               | Yes                                                       | Yes                                                      | Can't tell                                                            | Can't tell                                                                               | Yes                                                   | Can't tell                                        | Yes                                    | Can't tell                      | Yes                            | Yes                                                     | Yes                                                                 | Yes                                                       |
| Peng Y,2015[22]  | Yes                                               | Yes                                               | Yes                                                       | Yes                                                      | Can't tell                                                            | Can't tell                                                                               | Can't tell                                            | Can't tell                                        | Yes                                    | Can't tell                      | Yes                            | Yes                                                     | Yes                                                                 | Yes                                                       |
| Tan J,2015[23]   | Yes                                               | Yes                                               | Yes                                                       | Yes                                                      | Can't tell                                                            | Can't tell                                                                               | Can't tell                                            | Can't tell                                        | Yes                                    | Can't tell                      | Yes                            | Yes                                                     | Yes                                                                 | Yes                                                       |
| Cai L,2014[24]   | Yes                                               | Yes                                               | Yes                                                       | Yes                                                      | Can't tell                                                            | Can't tell                                                                               | Can't tell                                            | Can't tell                                        | Yes                                    | Can't tell                      | Yes                            | Yes                                                     | Yes                                                                 | Yes                                                       |

|                   |     |     |     |     |            |            |            |            |     |            |     |     |     |     |
|-------------------|-----|-----|-----|-----|------------|------------|------------|------------|-----|------------|-----|-----|-----|-----|
| Wang Q,2014[25]   | Yes | Yes | Yes | Yes | Can't tell | Can't tell | Yes        | No         | Yes | Can't tell | Yes | Yes | Yes | Yes |
| Gao C,2012[29]    | Yes | Yes | Yes | Yes | Can't tell | Can't tell | Yes        | Can't tell | Yes | Can't tell | Yes | Yes | Yes | Yes |
| Lee HS,2012[30]   | Yes | Yes | Yes | Yes | Can't tell | Can't tell | Yes        | Yes        | Yes | Can't tell | Yes | Yes | Yes | Yes |
| Zhang X,2012[32]  | Yes | Yes | Yes | Yes | Can't tell | Can't tell | Can't tell | Yes        | Yes | Can't tell | Yes | Yes | Yes | Yes |
| Tung EK, 2011[35] | Yes | Yes | Yes | Yes | Can't tell | Can't tell | Can't tell | Can't tell | Yes | Can't tell | Yes | Yes | Yes | Yes |
| Li B,2009[38]     | Yes | Yes | Yes | Yes | Can't tell | Can't tell | Yes        | Yes        | Yes | Can't tell | Yes | Yes | Yes | Yes |
| Makino T,2009[39] | Yes | Yes | Yes | Yes | Can't tell | Can't tell | Yes        | Yes        | Yes | Can't tell | Yes | Yes | Yes | Yes |
| Hu W,2020[A2]     | Yes | Yes | Yes | Yes | Can't tell | Can't tell | Yes        | Yes        | Yes | Can't tell | Yes | Yes | Yes | Yes |

---



| ==                                                       | No.of<br>Analyses | No.<br>of<br>participa<br>nts | Sensitivity,<br>(95% CI) | Specificity,<br>(95% CI) | Positive<br>Likelihood<br>Ratio (95%<br>CI) | Negative<br>Likelihood<br>Ratio (95%<br>CI) | Diagnostic Odds<br>Ratio (95% CI) | Area<br>Under<br>the<br>Curve | Meta-reg<br>ression | Publicati<br>on bias | GRADE |
|----------------------------------------------------------|-------------------|-------------------------------|--------------------------|--------------------------|---------------------------------------------|---------------------------------------------|-----------------------------------|-------------------------------|---------------------|----------------------|-------|
|                                                          |                   |                               | <b>DKK-1+AFP</b>         |                          |                                             |                                             |                                   |                               |                     |                      |       |
| <b>HCC</b>                                               | 12<br>(30)        | 7683                          | 0.91<br>(0.82-0.96)      | 0.88<br>(0.87-0.89)      | 6.39<br>(5.26-7.77)                         | 0.19<br>(0.16-0.23)                         | 36.57<br>(26.30-50.86)            | 0.9211*                       |                     | 0.945                | High  |
| <b>Compare<br/>d with<br/>LC±HB<br/>V±HCV<br/>in HCC</b> | 5(12)             | 2654                          | 0.80(0.78-0.82<br>)      | 0.82(0.79-0.84<br>)      | 4.36(3.69-5.17<br>)                         | 0.23(0.17-0.29)                             | 20.26(14.22-28.87)                | 0.8876                        | 0.14                | 0.582                | High  |
| <b>Early<br/>HCC</b>                                     | 5(13)             | 3138                          | 0.84(0.82-0.86)          | 0.87(0.85-0.88<br>)      | 5.56(4.20-7.37<br>)                         | 0.19(0.14-0.26)                             | 30.33(18.37-50.09)                | 0.9109*                       | 0.88                | 0.524                | High  |
|                                                          |                   |                               | <b>AFP</b>               |                          |                                             |                                             |                                   |                               |                     |                      |       |
| <b>HCC</b>                                               | 11(17)            | 4872                          | 0.65<br>(0.63-0.67)      | 0.73<br>(0.71-0.75)      | 3.17<br>(2.35-4.28)                         | 0.41(0.35-0.49)                             | 8.30(5.33-12.93)                  | 0.7941                        |                     | 0.180                | High  |
|                                                          |                   |                               | <b>DKK-1</b>             |                          |                                             |                                             |                                   |                               |                     |                      |       |
| <b>HCC</b>                                               | 17<br>(35)        | 9080                          | 0.71<br>(0.69-0.72)      | 0.87<br>(0.86-0.88)      | 5.12<br>(4.08-6.41)                         | 0.33<br>(0.29-0.37)                         | 17.08<br>(12.83-22.74)            | 0.8515                        |                     | 0.208                | High  |

**Table S6 SUCRA score from network meta-analysis for TNM stage and lymph node metastasis.**

| Sub-type  | TNM stage | Lymph node metastasis |
|-----------|-----------|-----------------------|
| EPC       | 83.7      | 61.1                  |
| GC        | 51.4      | 60                    |
| AEGJ      | 52        | 62.3                  |
| HCC       | 53.3      | 0                     |
| IHCC      | 51        | 43.7                  |
| PC        | 26.7      | 31.8                  |
| IHC       | 83.7      | 61.1                  |
| ELISA     | 51.4      | 60                    |
| Low group | 38.2      | 9                     |
